# Supplementary material for: Diversity of social-genetic relationships in the socially monogamous pied flycatcher (Ficedula hypoleuca) breeding in Western Siberia
Source: PeerJ. 2018 Dec 6;6:e6059. doi: 10.7717/peerj.6059 (PMC6286800; doi:10.7717/peerj.6059)
Supplement: Supplemental Information 1 [file peerj-06-6059-s001.xlsx]

## Sheet: urban plot
No	Nestbox	M age	M ring	F ring	F age	Monogamy	Polygamy	EPC	Blood sampling results
3	4	ad	xk 92877	xl 65425	sad		Yes		confirmed
21	66	ad	xk 92877	xl 65641	sad		Yes		confirmed
20	64	sad	xl 65079	xk 92075	ad		Yes		confirmed
23	81	sad	xl 65079	xl 65622	sad		Yes		confirmed
11	30	ad	xl 65428	xl 65135	sad		Yes		confirmed
25	86	ad	xl 65428	xk 65734	sad		Yes		confirmed
30	9	?	xl 65687	xl 65724	sad		Yes		confirmed for №37
37	37	ad	xl 65687	xt 95754	ad		Yes		confirmed for №9
14	35а	ad	xt 95114	xl 66066	sad		Yes		confirmed
27	89	ad	xt 95114	xl 66393	ad		Yes		confirmed
28	4	ad	xt 98143	xl 65723	sad		Yes		confirmed
35	28	ad	xt 98143	xt 96905	ad		Yes		confirmed
33	21	ad	xt 99930	xl 65500	ad		Yes	female replasement	confirmed
36	30	ad	xt 99930	xl 65686	sad		Yes		confirmed
34	25	ad	xk 92077	xt 99984	ad		Yes + EPC m		confirmed + male sire 1 nestling in №8
39	48	ad	xk 92077	xt 99957	ad		Yes		confirmed
4	8	ad	xk 92092	хк 92372	ad		Yes	EPC f	confirmed + 1 nestling due to EPC with male №25, 48
45	2	ad	xk 92092	xl 65630	sad		Yes		confirmed
19	60	ad	xk 92519	xl 66433	sad		Yes + EPC m		confirmed + male sire 2 nestlings in №83
26	87	ad	xk 92519	xk 92099	ad		Yes		confirmed
24	83	sad	xt 99584	xl 65045	sad			EPC f	confirmed + 2 nestling due to EPC with male №87, 60
15	39	sad	xt 99812	xk 92483	ad			EPC f	confirmed + 1 nestling due to EPC with male №47
17	47	ad	xk 99932	xt 99939	ad		EPC m		male sire 1 nestling in №39
29	7	ad	х1	хt 96907	ad	Yes
6	15	ad	xk 92968	xl 65601	ad	Yes
5	13	sad	xl 65036	xl 65424	ad	Yes
9	21	sad	xl 65112	xt 99960	ad	Yes
8	18	sad	xl 65133	xl 65308	sad	Yes
38	44	sad	xl 65164	xl 65695	ad	Yes
16	40а	ad	xl 65323	xk 41467	ad	Yes
10	28	sad	xl 65426	xl 65427	ad	Yes
46	3	ad	xl 65631	xt 99937	ad	Yes
43	19	sad	xl 65632	хк 92907	ad	Yes
41	13	sad	xl 65634	xl 65435	ad	Yes
31	13	sad	xl 65684	xk 92422	ad	Yes
40	32а	sad	xl 65685	xt 98007	ad	Yes
47	3	sad	xl 66048	xt 99562	ad	Yes
1	2	ad	xl 66068	xl 66067	sad	Yes
18	50	ad	xt 98104	xl 65392	sad	Yes
22	71	sad	xt 99361	хt 99855	sad	Yes
7	17	sad	xt 99590	xl 66394	ad	Yes
2	3	?	х2	xl 65725		Yes
12	32	?	х3	xl 65491	sad	Yes
32	20	?	х4	xt 99974	ad	Yes
42	17	?	х5	xl 65633	ad	Yes		egg dumping	confirmed
44	25	?	х6	xl 66215	sad	Yes

## Sheet: forest plot
ID	NestBox	Nfl	frt	frn	mrt	mrn	FemaleBS	MaleBS	PullBS	Bigam_status	Egg dumping				EPP							Polygamy		Replacements			"Monoterritorial polygamy"		EPC_males	Helpers	Note
											1-ED-#eggs-1	1-ED-f-1	1-ED-#eggs-2	1-ED-f-2	2-EPP	2-EPP-1m	2-EPP-1mn	2-EPP-2m	2-EPP-2mn	2-EPP-3m	2-EPP-3mn	3-bigam-nn	3-bigam	4-f-rep	4-2-m-rep	5-fm-rep	6-mtbigam-nn	6-mtbigam
1	1	6	xl	94837	vt	24100	1814	1816	Yes						0
2	2	8	xl	94607	vd	16785	1147	1462	Yes						0
3	3	7	vd	16304	xk	41405	299	232	Yes		1	xfm			0
4	4	7	xl	26393	xl	28319	94	96	Yes						0
5	5	7	xk	41452	xl	94928	300	231	Yes						1	1	257
6	6	3	xl	28471	vd	16779	942	946	Yes						0														Y
7	7	6	vd	16440	vd	16386	292	293	Yes						0
8	8	6	xl	93858	xl	94150	901	905	Yes						2	1	61	1	13
9	9	7	xl	94606	xl	93682	1464	1465	Yes						0
11	11	7	xl	94799	xk	41424	939	943	Yes						0
13	13	6	vd	16151	vd	16367	295	297	Yes	13					0														Y
14	14	6	xl	94635	vd	16998	1554	1548	Yes	13					2	2	17													y
15	15	4	vt	24185	vd	16382	1932	1931	Yes						0
16	16	4	xl	94619	vd	16486	1493	1498	Yes						2	2	33												Y
17	17	6	xl	94746	xl	28385	97	95	Yes						3	1	6	1	60	1	xm								Y
19	19	5	xl	94745	vd	16299	281	280	Yes						0
20	20	1	xl	94470	xk	41402	19	22	Yes	201					0							1	201
21	21	6	xt	96546	xl	94712	1495	1500	Yes						0
23	23	6	xl	94621	vd	16131	1494	1497	Yes						0
25	25	7	vd	16427	xk	40650	949	1103	Yes		2	xfm			0
26	26	6	vd	16103	xk	41247	294	296	Yes						4	4	xm
27	27	6	xl	94767	xl	28227	86	91	Yes						0
28	28	7	xl	94618	xk	41436	1474	1479	Yes						0
29	29	7	xt	96694	xl	94403	904	903	Yes						0
30	30	5	xl	94605	xl	94701	1128	1132	Yes						0														Y
31	31	8	xl	94766	xl	95845	87	92	Yes						0
32	32	7	xl	28772	xk	41192	748	750	Yes						0
33	33	6	xl	94743	xk	41950	230	298	Yes						0														Y
34	34	6	xl	94790	vd	16283	948	1150	Yes						2	1	35	1	33										Y
35	35	3	xk	41318	xl	28958	941	945	Yes						0														Y
36	36	1	xl	94625	vd	16779	1552	Yes	Yes	37					0							1	37							y
37	37	7	xl	94706	vd	16254	208	205	Yes	37					0
38	38	5	vt	24170	No	-1	1912	No	Yes						0									5 xf
39	39	8	xl	94608	vt	26735	1137	1135	Yes						0										8 xm
40	40	7	xl	94768	No	-1	79	No	Yes						0
41	41	7	vd	16505	vd	16776	923	931	Yes		2	xfm			0
42	42	5	xl	94775	vd	16683	746	745	Yes						0
43	43	8	vd	16338	vd	16775	925	926	Yes						0
44	44	7	xl	28497	vd	16778	936	933	Yes						0
45	45	4	xt	96074	vd	16242	249	67	Yes						0
47	47	6	xl	94789	xk	41751	950	1102	Yes						0														Y
48	48	8	xl	94788	vd	16340	1101	947	Yes						1	1	47
49	49	6	xl	94791	vd	16108	940	944	Yes						0
50	50	6	vd	16431	xl	94471	85	90	Yes						0
51	51	8	xl	94777	xl	93891	902	906	Yes						0
52	52	6	vd	16357	xk	40731	747	749	Yes	52					0
53	53	7	vd	16430	xl	93864	1555	1549	Yes						1	1	100
55	55	6	xl	28249	xl	94048	1110	1111	Yes						0
57	57	6	xl	94776	xl	94703	735	738	Yes						0
58	58	6	xl	94747	xl	93524	247	66	Yes						2	2	xm
59	59	7	xl	94769	xt	96091	75	81	Yes						0
60	60	7	xk	41711	xl	28160	744	739	Yes						0														Y
61	61	7	xl	28927	vd	16780	1106	1107	Yes						1	1	60												Y
62	62	6	xl	93752	xl	28902	733	736	Yes						0
63	63	7	vd	16377	vd	16278	82	78	Yes	77					0							7	77							y
65	65	7	xl	94765	xk	40321	77	83	Yes						0
66	66	7	xk	41527	xk	40077	250	69	Yes						0
67	67	8	xk	40600	vd	16290	207	209	Yes						0
68	68	6	vd	16041	vd	16589	88	93	Yes		1	xfm			0
69	69	7	xl	94028	vd	16817	1476	1481	Yes						0
70	70	7	xk	41757	vd	16258	210	213	Yes						0												1	70
71	71	5	vt	26744	No	-1	206	No	Yes						0
72	72	5	xl	28173	xk	40471	1108	1104	Yes						0														Y
73	73	6	vd	16363	vd	16554	1531	1533	Yes						1	1	61
76	76	6	xl	93582	xl	93654	248	68	Yes						0									6 xf
77	77	7	vd	16524	vd	16336	927	929	Yes	77					0
78	78	6	xl	28324	xk	41432	72	74	Yes						0														Y
79	79	6	vt	26715	xl	94268	743	740	Yes						0												1	79
80	80	7	xt	96672	vd	16259	16	15	Yes						0
82	82	6	xk	41519	vd	16787	1470	1473	Yes						0
83	83	6	vd	16061	xl	94014	1467	1466	Yes						0
84	84	6	xt	96054	vd	16390	742	741	Yes						0
85	85	6	xl	28463	xl	94209	1558	1560	Yes						2	1	239	1	xm
86	86	6	xl	94764	vd	16392	80	76	Yes						0
88	88	7	xl	28189	xl	94708	84	89	Yes						0
90	90	6	xl	94617	vd	16884	1532	1529	Yes						0
91	91	7	xk	41644	xl	28891	214	215	Yes						1	1	34												Y
92	92	5	xl	94735	xl	94859	211	212	Yes						0
93	93	6	xl	94721	xl	93742	24	23	Yes						0
94	94	6	vd	16442	xl	94931	71	70	Yes						6	3	xm	3	xm											y
95	95	6	xl	93631	vd	16005	1109	1105	Yes						0
97	97	7	xl	28503	xk	41411	500	73	Yes						0												2	97
98	98	4	xk	41900	xk	41654	21	18	Yes						0														Y
99	99	5	xk	41068	vd	16368	734	737	Yes						0
100	100	5	vt	24152	vt	24153	1891	1892	Yes						1	1	224												Y
101	101	7	xt	96685	xk	41408	1118	1120	Yes						0
103	103	5	xl	94742	xl	28232	238	245	Yes						0
104	104	6	xl	94728	xl	94673	25	26	Yes						0
105	105	4	xl	94057	vd	17300	1563	1565	Yes						0
106	106	6	xl	93813	xk	41576	727	732	Yes						0
107	107	7	vd	16504	xl	28259	934	938	Yes						0
108	108	6	xl	94616	xl	94716	1524	1527	Yes						0											6 xfm
109	109	3	xl	93805	vt	24156	1895	1896	Yes						0
110	110	4	vd	16496	vt	24127	1844	1846	Yes						0
111	111	5	xl	94284	vd	16777	935	932	Yes						0
112	112	4	xl	28852	xl	28537	701	709	Yes						0
113	113	6	xl	94213	xk	41879	930	937	Yes						0														Y
114	114	7	xk	41476	vd	16243	98	99	Yes						1	1	91
115	115	8	xk	41529	xl	93650	28	30	Yes						0
116	116	5	xl	94393	xl	28208	722	726	Yes						0									5 xf
117	117	8	xl	94615	vd	16816	1477	1480	Yes						0									8 xf
118	118	5	vd	16435	xl	94704	703	712	Yes						0
119	119	6	vd	16526	xl	28188	243	240	Yes						0
120	120	7	vd	16534	xk	41404	27	29	Yes						0														Y
121	121	6	xl	28815	xk	41730	921	913	Yes						2	1	120	1	xm
122	122	6	xk	41506	xl	28918	1114	1124	Yes						0
123	123	7	xl	94762	xl	28539	728	729	Yes						0
124	124	7	xl	94741	xl	94929	246	233	Yes						0
125	125	5	xl	28709	vd	16517	236	235	Yes		1	xfm			0														Y
126	126	7	xk	41855	xl	93557	705	710	Yes						0
127	127	8	vd	16185	xl	94110	1521	1522	Yes						0
128	128	6	xk	41600	vd	16682	723	725	Yes						0											6 xfm
129	129	6	xl	94760	xk	41431	707	704	Yes						0
130	130	6	vd	16464	vd	16781	1116	1123	Yes						0									6 xf					Y
133	133	6	xl	94761	xl	95846	706	708	Yes		3	xfm			2	2	125
134	134	7	xl	94787	xk	41434	924	928	Yes						2	2	xm
135	135	6	xl	94718	xk	41403	1	12	Yes						0
136	136	5	xl	94214	xl	95847	702	711	Yes						0
137	137	5	vd	16456	No	-1	2327	No	Yes						0
138	138	6	xl	94785	xl	93863	914	922	Yes						0
139	139	5	xl	94671	vd	16519	1784	1787	Yes						2	2	143
140	140	4	xl	94784	xk	41912	907	910	Yes						0
141	141	5	vt	24155	vt	24154	1894	1893	Yes						0
142	142	5	xl	94740	xl	94930	244	239	Yes						0
143	143	7	xl	94719	vd	16225	17	20	Yes						0														Y
144	144	5	xl	94798	vt	26899	1113	1121	Yes						0
145	145	6	xl	93734	xl	28691	1129	1133	Yes						0
148	148	3	xl	94763	xl	94102	1914	1910	Yes						0
150	150	7	xk	41462	xk	41421	226	227	Yes						0
151	151	7	xl	94603	vd	16786	1468	1469	Yes						0														Y
152	152	7	xl	94720	vd	16540	13	14	Yes						0
153	153	6	xl	94294	xl	94900	228	229	Yes						0														Y
154	154	7	xk	41526	xl	93622	1115	1122	Yes						3	3	231
156	156	5	xt	96681	vd	16886	1538	1539	Yes						1	1	30
157	157	4	xl	94384	xl	28289	1136	1134	Yes						1	1	153
158	158	5	xt	96568	vd	16887	1536	1540	Yes						2	2	163
159	159	5	xk	41514	vd	16303	1475	1478	Yes						0														Y
160	160	7	xk	40235	vd	16285	222	216	Yes						0
161	161	7	xt	96587	xk	40289	203	202	Yes						0														Y
162	162	6	vd	16525	vd	16296	217	224	Yes						0
163	163	7	xl	94602	xl	28976	1471	1472	Yes						0														Y
164	164	7	xl	94155	vd	16773	908	911	Yes						0
165	165	6	xl	94815	xl	94715	1818	1820	Yes						4	4	xm
166	166	7	vd	16126	xt	96310	919	917	Yes						0
167	167	6	xl	93719	xk	40659	715	718	Yes		3	xfm			0															y	gen and social father 185
168	168	6	vd	16452	xl	94058	1117	1125	Yes						2	2	173
169	169	7	xl	94739	xk	40263	242	241	Yes						1	1	198
171	171	7	xl	94752	xk	40628	716	717	Yes						0									7 xf
173	173	8	xk	41515	vd	16273	920	916	Yes						0														Y
174	174	6	xl	94797	vd	16305	1119	1112	Yes						0
175	175	5	vt	24206	No	-1	2316	No	Yes						0											5 xfm
176	176	7	xl	94774	xk	41342	721	724	Yes						1	1	xm
177	177	3	xl	28631	vt	24212	2323	2322	Yes						0
178	178	6	xl	93613	xk	40131	731	730	Yes						0
179	179	6	xl	94624	vd	16888	1544	1541	Yes						1	1	151
180	180	6	xl	94733	vd	16378	221	218	Yes						1	1	113
181	181	8	xk	41681	xk	41636	40	38	Yes						5	5	214
182	182	4	xl	93652	xl	94004	1564	1562	Yes						0
183	183	7	xk	41505	vd	16326	713	720	Yes						0										7 xm						sired by x male
184	184	6	vd	16426	xl	28611	1545	1542	Yes		1	154	1	xfm	0												1	184
185	185	7	xt	96569	xk	40857	714	719	Yes						2	2	196														genetic and social father is male 183
186	186	7	xt	96555	vd	16782	1127	1131	Yes						0
187	187	5	xk	40757	xl	94138	Yes	1543	Yes						0										5 xm
188	188	6	xl	28897	xl	28916	1126	1130	Yes		1	xfm			1	1	200
189	189	5	xk	41448	xt	96184	220	225	Yes						5	3	xm	2	xm										Y
190	190	5	xk	41473	vd	16306	41	39	Yes						1	1	130
191	191	7	xt	96589	xt	96116	204	42	Yes						1	1	159										3	191
192	192	6	xk	40900	vd	16774	909	912	Yes		1	xfm			2	2	161
193	193	4	vd	16500	xl	94702	223	219	Yes						0
194	194	4	vt	24201	vd	16263	2311	1950	Yes		1	xfm			0
195	195	7	xl	28967	vd	16248	49	50	Yes						0
196	196	6	xt	96686	vd	16329	234	237	Yes						0									6 xf					Y
197	197	5	vd	16475	vd	16885	1537	1535	Yes						0
198	198	5	xl	94670	xk	41049	1649	1650	Yes		4	xfm			0														Y
199	199	7	xl	94783	vt	26752	918	915	Yes						5	5	xm
200	200	7	xl	94734	vd	16370	48	201	Yes						0														Y
201	201	6	xk	41443	xk	41402	1458	1460	Yes	201					0							7	201
203	203	5	xl	94838	xl	28319	1783	1788	Yes						0											5 xfm
204	204	4	xl	94634	No	-1	1518	No	Yes						0
207	207	4	xl	94450	No	-1	1819	No	Yes	13					0							4	13
211	211	5	xl	94736	vd	16362	1843	1847	Yes						0
214	214	5	xl	94620	xl	94065	1492	1499	Yes						0														Y
215	215	3	xl	94511	xl	93639	1845	1848	Yes						2	2	16
216	216	4	xl	94744	vd	16516	1911	1913	Yes						0
218	218	6	xl	94520	xl	93555	1146	1463	Yes						1	1	98
220	220	5	xl	93615	vd	16783	1148	1459	Yes						0
221	221	5	xl	94626	xl	94537	1519	1520	Yes						0
223	223	3	vd	16600	No	-1	1550	No	Yes	52					0							2	52
224	224	6	xl	94082	xl	93664	1645	1648	Yes						1	1	72												Y
229	229	6	xl	94080	vt	24078	1785	1786	Yes						1	1	35
230	230	6	xl	94604	vd	16684	1149	1461	Yes						0
231	231	3	vt	24143	xl	28198	1871	1872	Yes						0														Y
235	235	5	xl	93684	vd	16882	1491	1496	Yes						4	4	60
238	238	5	xl	94921	vd	16229	1815	1817	Yes						0
239	239	5	xl	28102	vt	26788	1553	1556	Yes						0									5 xf					Y
241	241	6	vd	16429	vd	16999	1551	1557	Yes						1	1	47
242	242	4	xl	28650	vd	16152	1937	1938	Yes						0
248	248	2	xl	94064	No	-1	1644	No	Yes						0
251	251	6	vd	16441	vd	16267	1483	1482	Yes						4	3	189	1	xm
257	257	5	xl	94661	xl	94713	1546	1547	Yes						0														Y
267	267	5	xl	94023	xl	94142	1523	1526	Yes						0
269	269	6	xl	94660	xl	93795	1559	1561	Yes						1	1	78
271	271	3	xl	93554	No	-1	1849	No	Yes						0
272	272	6	xl	94672	xl	94228	1646	1647	Yes						0
279	279	6	xl	94263	vd	16883	1525	1528	Yes						0									6 xf
281	281	6	xl	93942	xl	28721	1530	1534	Yes						0
282	301	6	xk	41725	xk	41808	3	53	Yes						0									6 xf
283	302	5	vt	24195	vt	24194	1944	1943	Yes						2	2	336
284	303	6	xl	94781	xl	93579	821	830	Yes						0
285	304	8	xk	41453	xl	93592	4	51	Yes	304					0
286	305	7	vd	16632	xl	95179	476	475	Yes						1	1	323
287	306	6	xk	40855	vd	16397	467	484	Yes						1	1	xm
288	307	6	vd	16414	xl	28470	822	823	Yes	307					0
290	309	4	xl	94623	No	-1	1801	No	Yes	307					0							4	307
291	310	5	xl	93747	No	-1	1837	No	Yes	304					0							5	304
292	311	8	xl	28072	xk	41965	44	47	Yes						0
293	312	7	vd	16473	xl	93672	1446	1447	Yes						0
294	313	6	xl	94729	xl	95112	334	333	Yes						0
295	314	7	xl	94738	xl	95150	458	459	Yes						0
296	315	5	vt	26703	No	-1	1448	No	Yes						0
297	316	6	xl	94732	xl	28359	318	317	Yes		2	2 eggs from 319			0												2	316			male
299	318	6	xk	41522	xl	28644	457	662	Yes						0									6 xf
300	319	7	xl	94782	xk	40271	837	838	Yes						0
301	320	6	xk	41864	xk	40567	957	955	Yes						0
302	321	8	xl	94727	xk	41823	56	55	Yes						0
303	322	8	xl	94726	vd	16387	43	45	Yes						0
304	323	6	xl	28294	vd	16543	59	60	Yes	323					0							6	332						Y
305	324	8	xk	41524	xl	95076	61	58	Yes						2	2	xm
306	325	8	xl	94725	xl	95037	46	54	Yes						0
307	326	6	xl	94750	xl	95271	625	642	Yes						0
308	327	6	vd	16343	xl	95263	641	624	Yes						0														Y
309	328	7	xl	94796	vd	16380	1138	1141	Yes						0
311	330	7	vd	16528	xk	40262	846	847	Yes						0
312	331	6	xl	93663	xl	93517	486	485	Yes						0
313	332	4	xk	41507	vd	16543	1144	1142	Yes	323					0							4	323
314	333	8	xl	94731	xk	40381	62	57	Yes						0
315	334	6	vd	16567	xl	95272	633	643	Yes						0
317	336	6	xk	40522	xk	40032	No	956	Yes						0														Y
318	337	8	xl	94622	xl	93818	1139	1140	Yes						0
319	338	7	vd	16411	vd	16029	487	488	Yes						0
321	340	7	xl	28346	xl	93757	489	490	Yes						0
323	342	3	xl	95099	xk	40294	1926	1927	Yes						1	1	327
324	343	7	xk	41477	xl	93545	616	617	Yes						0
325	344	7	xl	94705	xl	93572	1143	1145	Yes						0
326	345	8	vd	16415	xt	96008	5	52	Yes						1	1	350
327	346	7	xl	94751	vd	16633	973	964	Yes						0
328	347	8	xk	41695	xl	95208	491	493	Yes						0
329	348	6	xk	40984	xl	94586	492	972	Yes						0
330	349	4	xl	93665	xl	93748	1449	1450	Yes	350					0							4	349						Y
331	350	6	xl	94724	xl	93748	64	63	Yes	350	1	xfm			0							6	349
